# Supplementary material for: Temporal pattern and synergy influence activity of ERK signaling pathways during L-LTP induction
Source: eLife journal article supplement (doi:10.7554/elife.64644), 2021-08-10
Supplement: supp [file elife_poa_e64644_Figure_7_figure_supplement_1.pdf › elife_poa_e64644_Figure_7_figure_supplement_1.pdf]

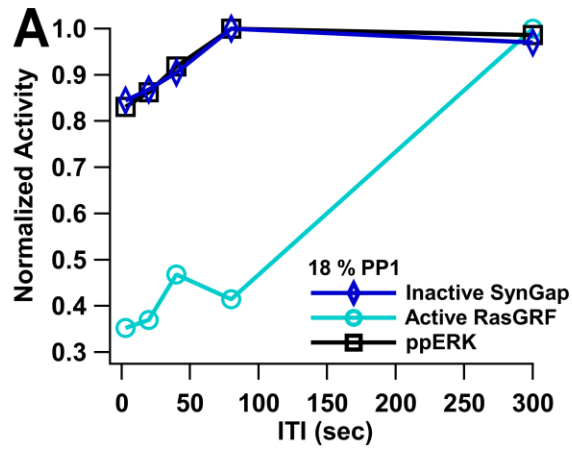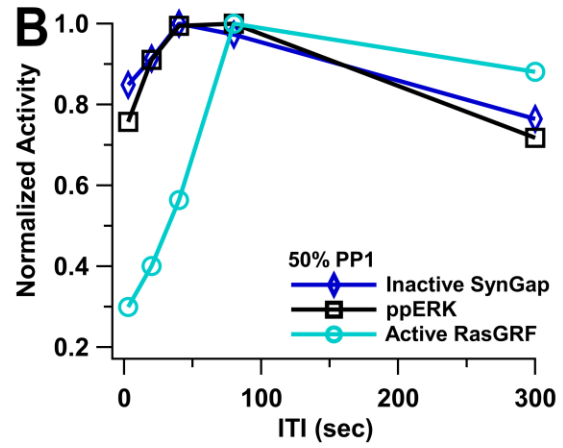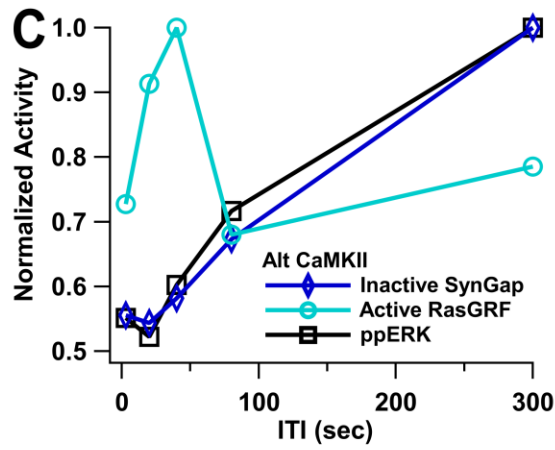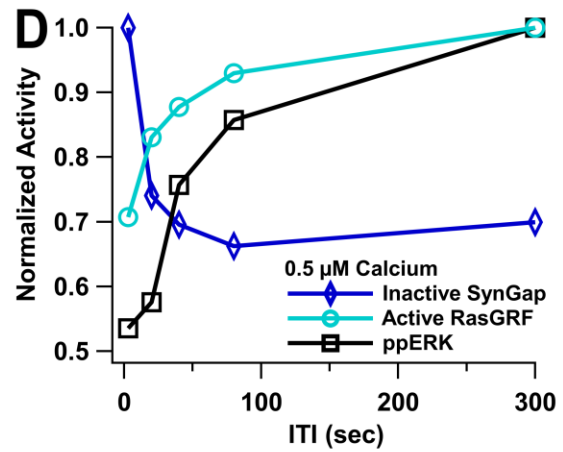

**E**

|                     |        | Correlation     |               |
|---------------------|--------|-----------------|---------------|
|                     |        | Inactive SynGap | Active RasGRF |
| 18% PP1             | R      | 0.9907          | 0.5832        |
|                     | pValue | <b>0.0005</b>   | 0.1510        |
| 50% PP1             | R      | 0.9693          | 0.1852        |
|                     | pValue | <b>0.0032</b>   | 0.3827        |
| alt CaMKII          | R      | 0.9917          | -0.3188       |
|                     | pValue | <b>0.0004</b>   | 0.6994        |
| 0.5 $\mu$ M calcium | R      | -0.6971         | 0.9450        |
|                     | pValue | 0.9046          | <b>0.0077</b> |
